# Supplementary material
Source: HighWire-hosted journal article supplement (http://ebm.bmjjournals.com/highwire/filestream/142109/field_highwire_adjunct_files/0/ebmed-2012-100645supp_appendix.docx)
Supplement: ebmed-2012-100645supp_appendix.docx [file ebmed-2012-100645supp_appendix.docx]

# Supplementary file 1: Appendix to “Ten principles for high-quality, high-value testing”.

Tests and investigations that may provide low-quality, low-value health-care as suggested in an email/online questionnaire and survey conducted in 2011 in two large acute hospitals within an NHS Foundation Trust.

**Imaging investigations**

1. CT (computerized tomography) scan
2. CT scan abdomen & pelvis
3. CT scan body
4. CT scan head
5. CT scan pulmonary angiogram
6. CT scan petrous bone
7. CT scans
8. CT scan sinuses
9. Imaging to exclude metastases
10. Ioflupane radio-isotope scanning
11. MRI (magnetic resonance imaging)
12. MRI abdomen
13. MRI brain/spine
14. MRI head
15. MRI head, spinal cord, lumbar spine
16. MRI internal acoustic meatus
17. MRI musculoskeletal
18. PET (positron emission tomography) scans
19. Thyroid scintigraphy
20. US (ultrasound)
21. US abdomen
22. US carotid doppler
23. US neck
24. US thyroid
25. XR (X-ray)
26. XR abdomen
27. XR abdomen - lateral
28. XR- barium swallow
29. XR chest
30. XR dental
31. XR fluoroscopy
32. XR KUB (kidney, ureters, bladder)
33. XR lumbar spine
34. XR ORIF (open reduction, internal fixation) zygoma
35. XR spine

**Laboratory tests**

- 1. Acetylcholine receptor antibodies
  2. Anti-CCP (cyclic citrullinated peptide) antibodies
  3. Antifungal levels
  4. Anti-nuclear antibody
  5. Auto-antibodies
  6. Biochemistry
  7. Blood ammonia
  8. Blood culture
  9. Blood gases
  10. Blood tests
  11. Carbon breath test for *Helicobacter pylori*
  12. CD4 counts
  13. Coagulation tests
  14. CRP (c-reactive protein)
  15. Culture wound swabs
  16. D-dimers
  17. D-dimers and troponins
  18. ENA-antibodies (extractable nuclear antigens)
  19. Encephalopathy assessment tests
  20. Fasting gut hormones
  21. FBC (full blood count)
  22. FBC, U&E
  23. FBC, U&E, CXR, PFTs
  24. FBC, U&E, LFTs
  25. Free light chains
  26. FSH (follicle-stimulating hormone)
  27. Genital swabs
  28. Genotyping - cystic fibrosis
  29. Glucose - serum
  30. Group and save
  31. Group and save +/- cross match
  32. Haematology
  33. Hb (haemoglobin)
  34. Immunoglobulins
  35. Insulin
  36. Intact PTH (parathyroid hormone)
  37. LFTs (liver function tests)
  38. Lipid profile
  39. Magnesium
  40. Phosphate
  41. Pneumococcal serotype specific antibodies
  42. Repeated in-patient blood tests.
  43. Rheumatoid factor
  44. Routine bloods
  45. Routine U&E, FBC
  46. Routine haematology
  47. Routine LFTs, coagulation, etc
  48. Routine pre-op bloods
  49. Screening for metastases
  50. Serum chloride
  51. Serum glucose
  52. Serum ionised calcium
  53. Serum phosphate
  54. SHBG (sex hormone binding globulin)
  55. Swabs for MRSA (meticillin-resistant *Staphylococcus aureus*)
  56. Swabs of mouth for candida
  57. Swabs of vagina
  58. Tests for cardiac ischaemia (e.g. myocardial perfusion scan)
  59. TFT (Thyroid function tests)
  60. Troponins
  61. Tumour markers
  62. Tumour markers - CA 125
  63. Tumour markers such as CA 153
  64. U&E (urea and electrolytes)
  65. U&E, LFTs
  66. Urinalysis for stone formation
  67. Urine culture and sensitivities
  68. Urine microscopy
  69. Urine protein/creatinine + albumin/creatinine
  70. Viral PCR (polymerase chain reaction)
  71. Viral PCR - respiratory
  72. Virology on nasopharyngeal aspirates
  73. Vitamin B12 and folate
  74. Vitamin D

**Procedural investigations**

1. Colonoscopy
2. Echocardiography
3. Echocardiography - dobutamine stress
4. Localisation studies (involve laboratory and imaging investigations before interventional)
5. Visual fields

**Technical investigations**

1. 24-hour ECG (electrocardiogram)
2. ECG
3. EEG (electro-encephalogram)
4. EMG (electromyogram)
5. FNAC (fine needle aspiration under US guidance)
6. Nerve conduction studies
7. PFTs (pulmonary function tests)
